# Supplementary material
Source: JCI journal article supplement (doi:10.1172/jci195005)
Supplement: sd1 [file 1]

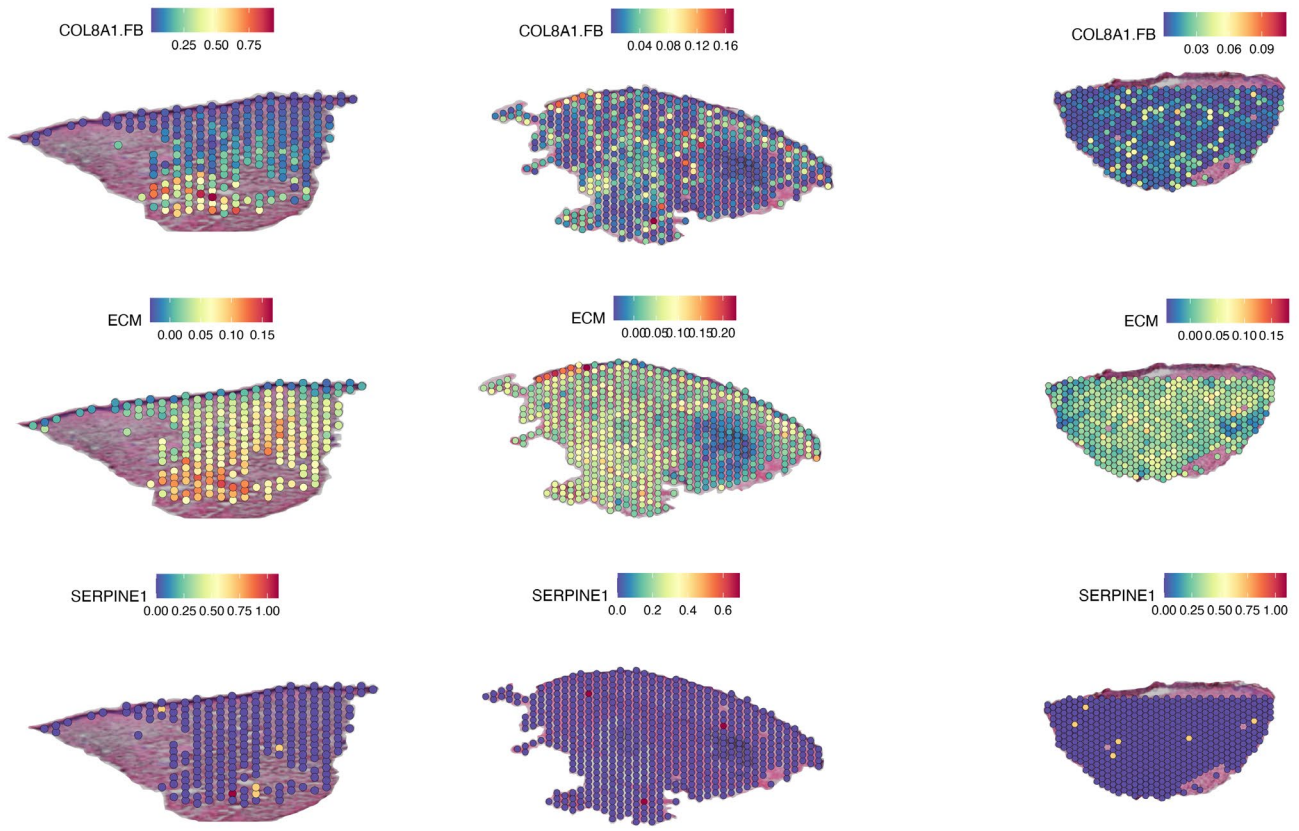

**Figure S1. Visium spatial sequencing analyses.** Visium data for COL8A1, SERPINE1 and ECM module.

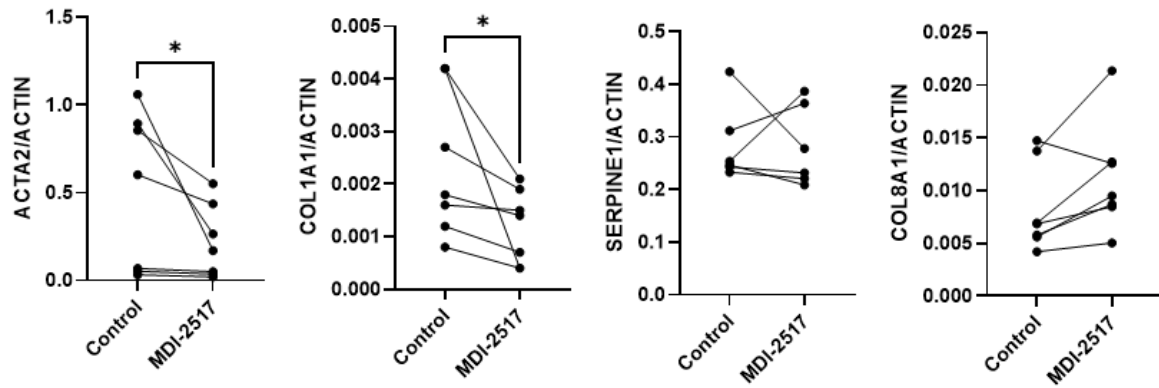

**Figure S2. Downregulate pro-fibrotic markers in human SSc fibroblasts by MDI-2517.** The non-normalized data from Figure 2B. Dermal fibroblasts from SSc patients were treated with MDI-2517 and gene expression of various genes were quantified by qPCR.\*  $p < 0.05$  by two-tailed t-test.

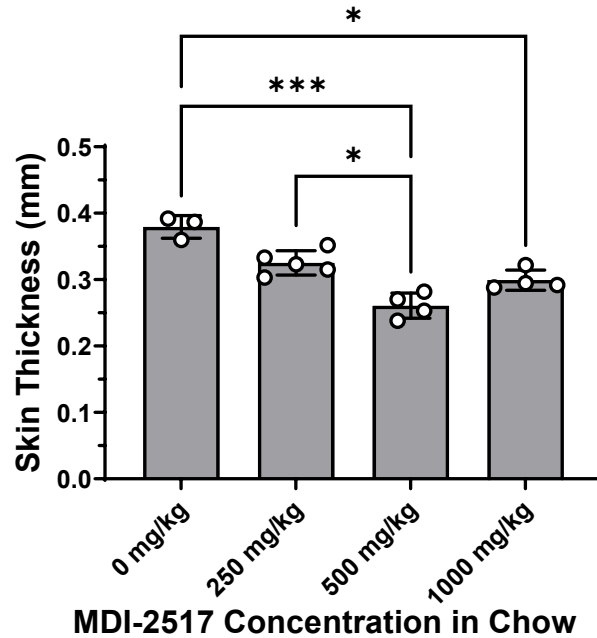

**Figure S3. Dose response of MDI-2517 in bleomycin scleroderma model:** Twelve-week-old male C57BL/6J mice were subcutaneously implanted with osmotic pumps that delivers 100U/kg (total) of bleomycin over 7 days or saline. The pumps were then removed and at that time the mice were placed on either control chow (0 mg/kg) or chow containing MDI-2517 at concentrations of drug in chow of 250mg/kg, 500mg/kg, or 1000mg/kg. On day 28 skin thickness was determined at multiple location by skin pinch with calipers. Data is shown as mean  $\pm$  SD, n is indicated in each figure by the individual data points (3-5), \* p<0.05, \*\*\* p<0.001, by Kruskal-Wallis test.

PAI-1

H & E

Picrosirius Red

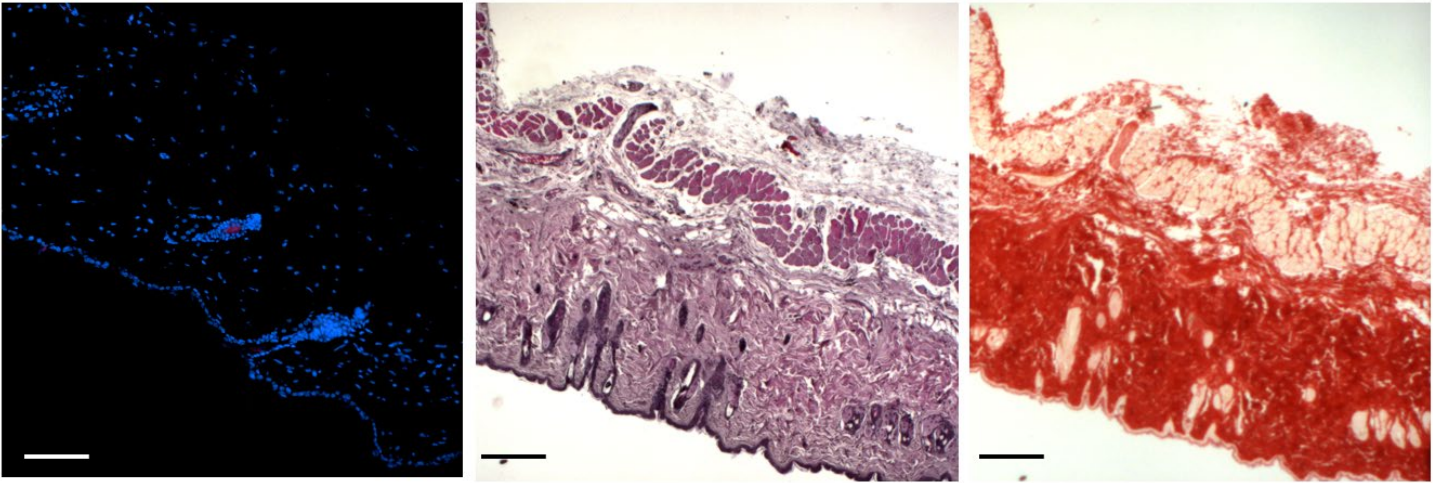

**Figure S4. Naïve mouse skin.** Skin from naïve twelve-week-old male C57BL/6J mice. A) PAI-1 antigen in skin (red) and DAPI nuclear stain (blue), B) hematoxylin and eosin (H&E) C) Picrosirius Red staining, scale bar = 100 $\mu$ m.

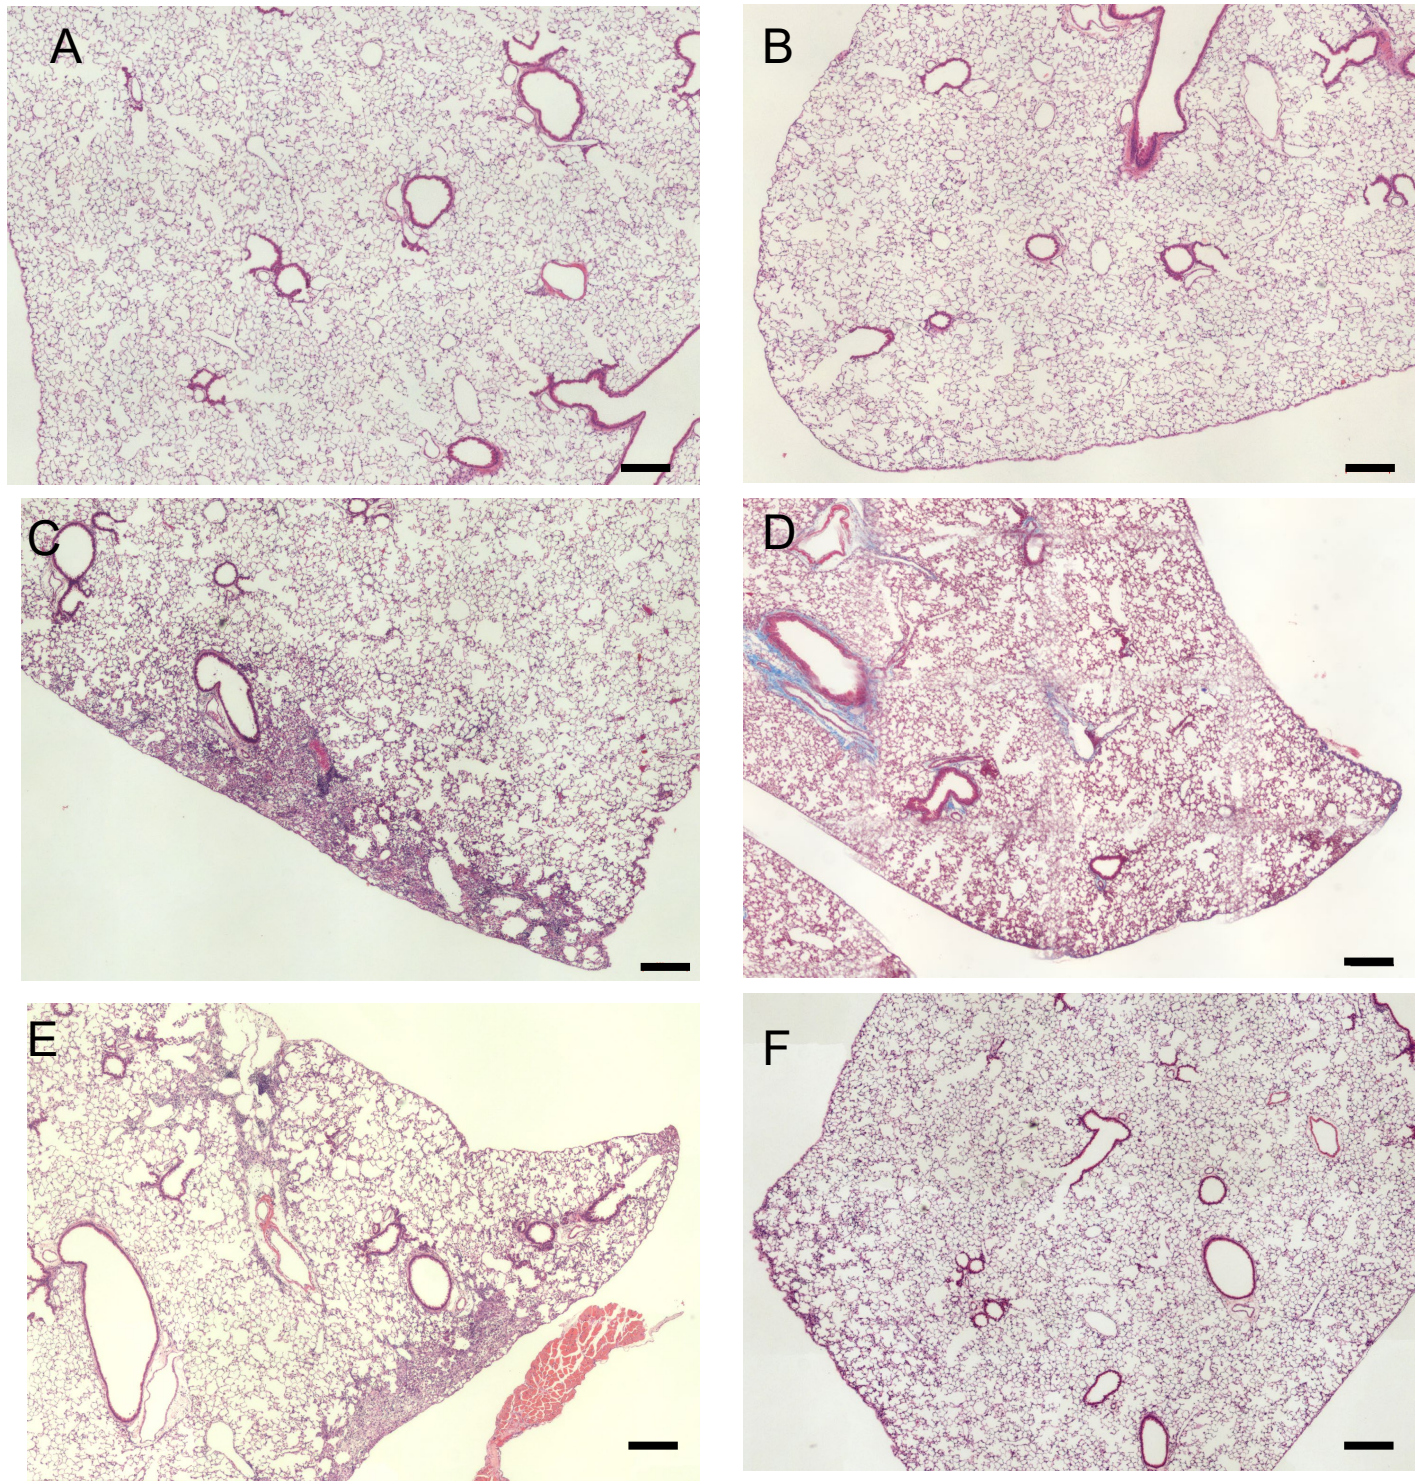

**Figure S5, Low Resolution Images of Lung trichrome staining from the comparator study of MDI-2517, mycophenolate (MMF) and combined MMF+MDI-2517.** Twelve-week-old male C57BL/6J mice were subcutaneously implanted with osmotic pumps that delivers 100U/kg (total) of bleomycin or saline over 7 days. The pumps were then removed, and at that time the mice were placed on treatment chows (drug concentration in chow: Vehicle, 0 mg/kg, MDI-2517 at 500 mg/kg, MMF at 1000mg/kg or combined MDI-2517 at 500 mg/kg and MMF at 1000 mg/kg,). On day 28, lung tissues were prepared for histological analysis by Mason Trichrome Stain. A) Saline Control Chow, B) Saline MDI-2517 chow, C) Bleomycin control chow (No Treatment), D) Bleomycin MDI-2517 chow, E) Bleomycin MMF chow, F) Bleomycin combined MMF and MDI-2517 chow, Scale Bar = 250  $\mu$ m

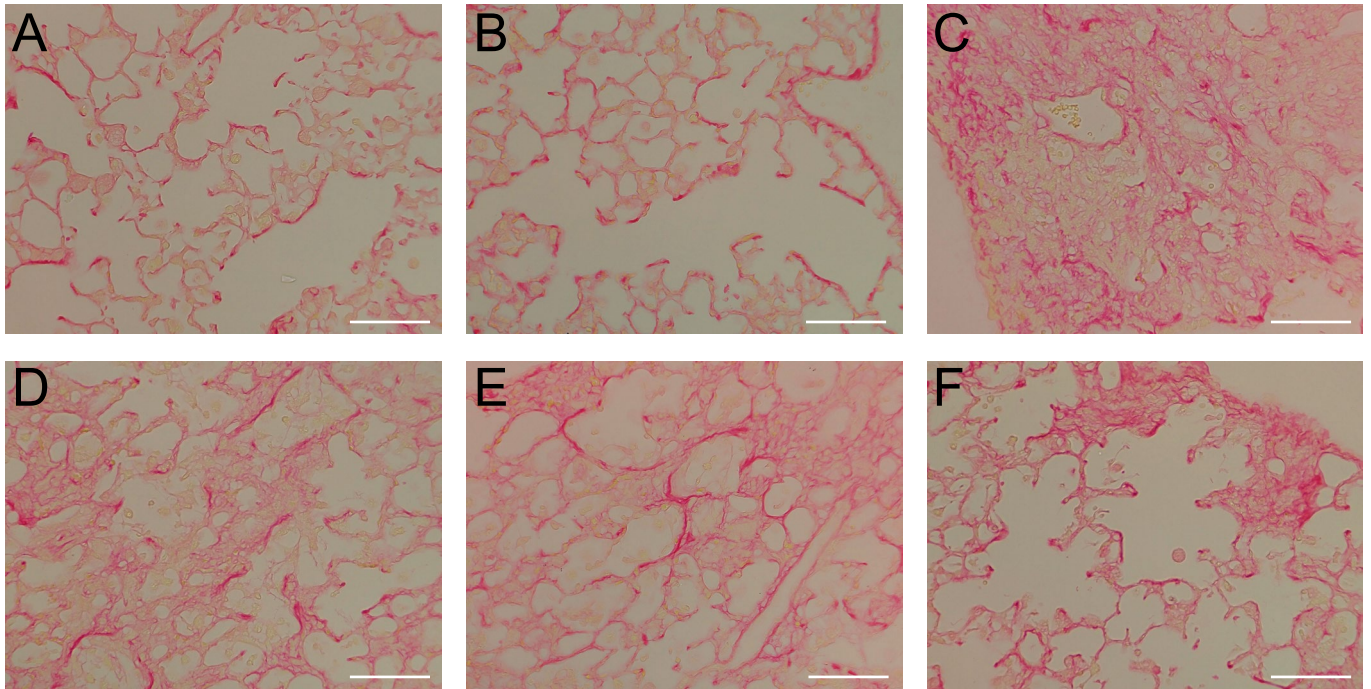

**Figure S6, Lung Picrosirius Red staining from the comparator study of MDI-2517, mycophenolate (MMF) and combined MMF+MDI-2517.** Twelve-week-old male C57BL/6J mice were subcutaneously implanted with osmotic pumps that delivers 100U/kg (total) of bleomycin or saline over 7 days. The pumps were then removed, and at that time the mice were placed on treatment chows (drug concentration in chow: Vehicle, 0 mg/kg, MDI-2517 at 500 mg/kg, MMF at 1000mg/kg or combined MDI-2517 at 500 mg/kg and MMF at 1000 mg/kg,). On day 28, lung tissues were prepared for histological analysis. A) Saline Control Chow, B) Saline MDI-2517 chow, C) Bleomycin control chow (No Treatment), D) Bleomycin MDI-2517 chow, E) Bleomycin MMF chow, F) Bleomycin combined MMF and MDI-2517 chow. Scale bar = 50 $\mu$ m.

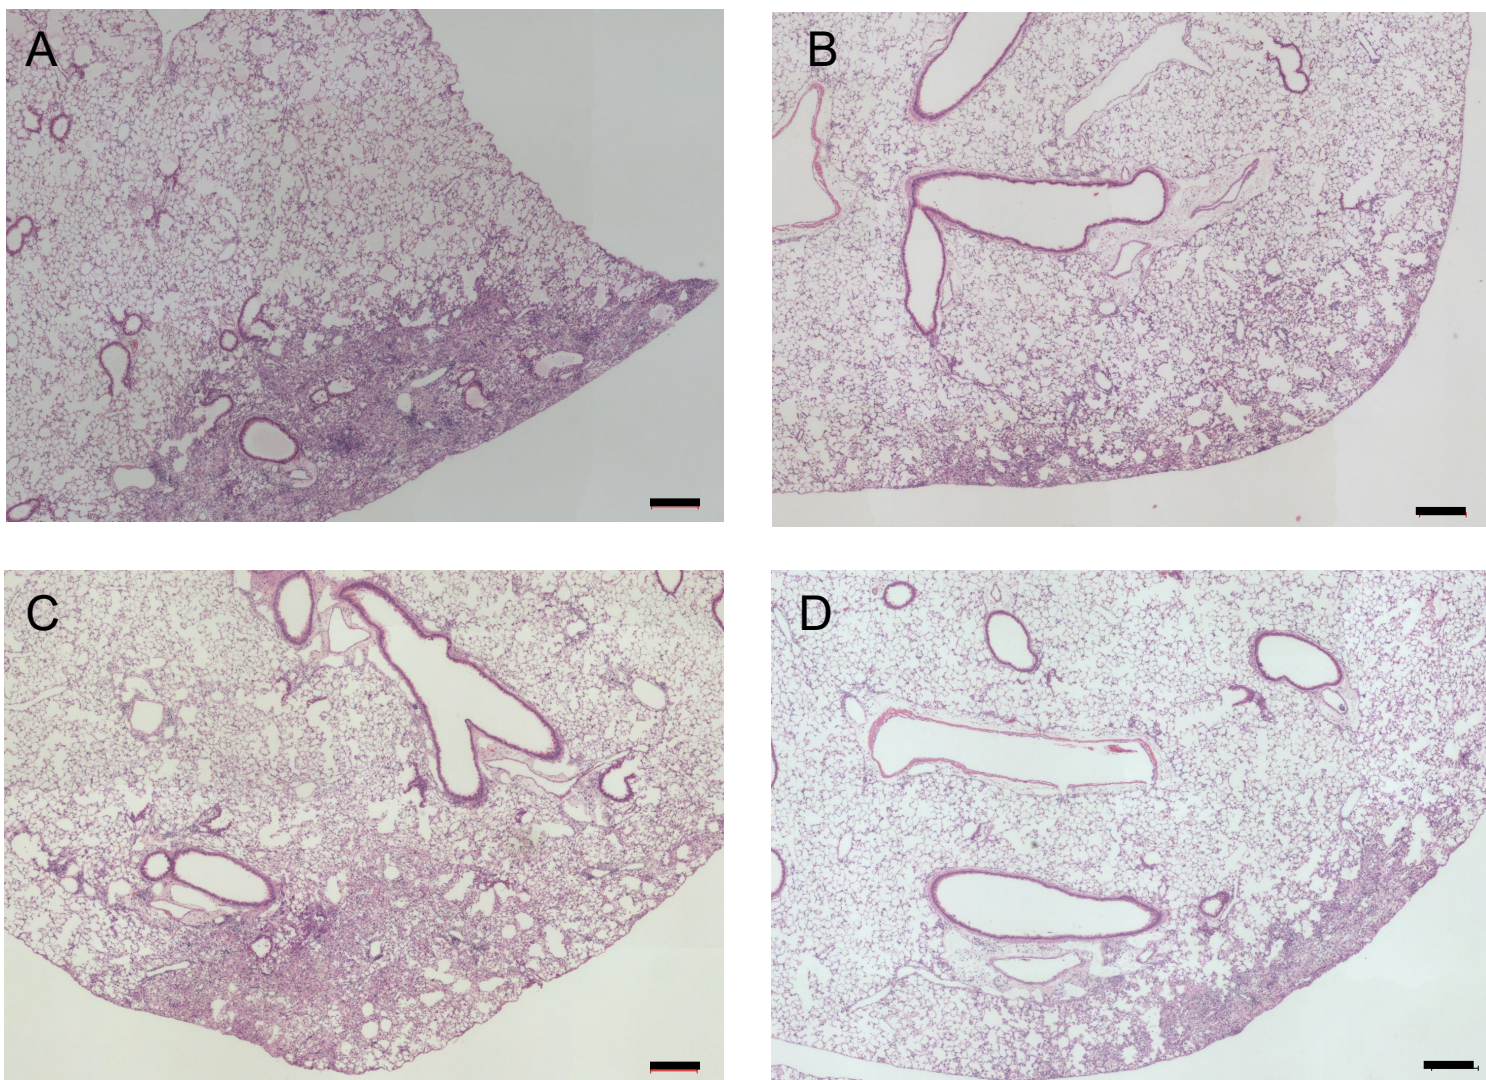

**Figure S7, Low Resolution Images of Lung trichrome staining from the comparator Study MDI-2517, Tiplaxtinin Low and High Dose.** Twelve-week-old male C57BL/6J mice were subcutaneously implanted with osmotic pumps that delivers 100U/kg (total) of bleomycin over 7 days. The pumps were then removed, and at that time the mice were placed on treatment chows (drug concentration in chow: Vehicle, 0 mg/kg, MDI-2517 at 500 mg/kg, Tiplaxtinin Low dose at 500 mg/kg or Tiplaxtinin High dose at 5000 mg/kg). On day 28 mice were sacrificed and lung tissues prepared for histological analysis by Mason Trichrome stain. A) Bleomycin control chow (No Treatment), B) Bleomycin MDI-2517 chow, C) Bleomycin Tiplaxtinin Low dose chow, D) Bleomycin Tiplaxtinin High dose chow. Scale Bar = 250  $\mu$ m

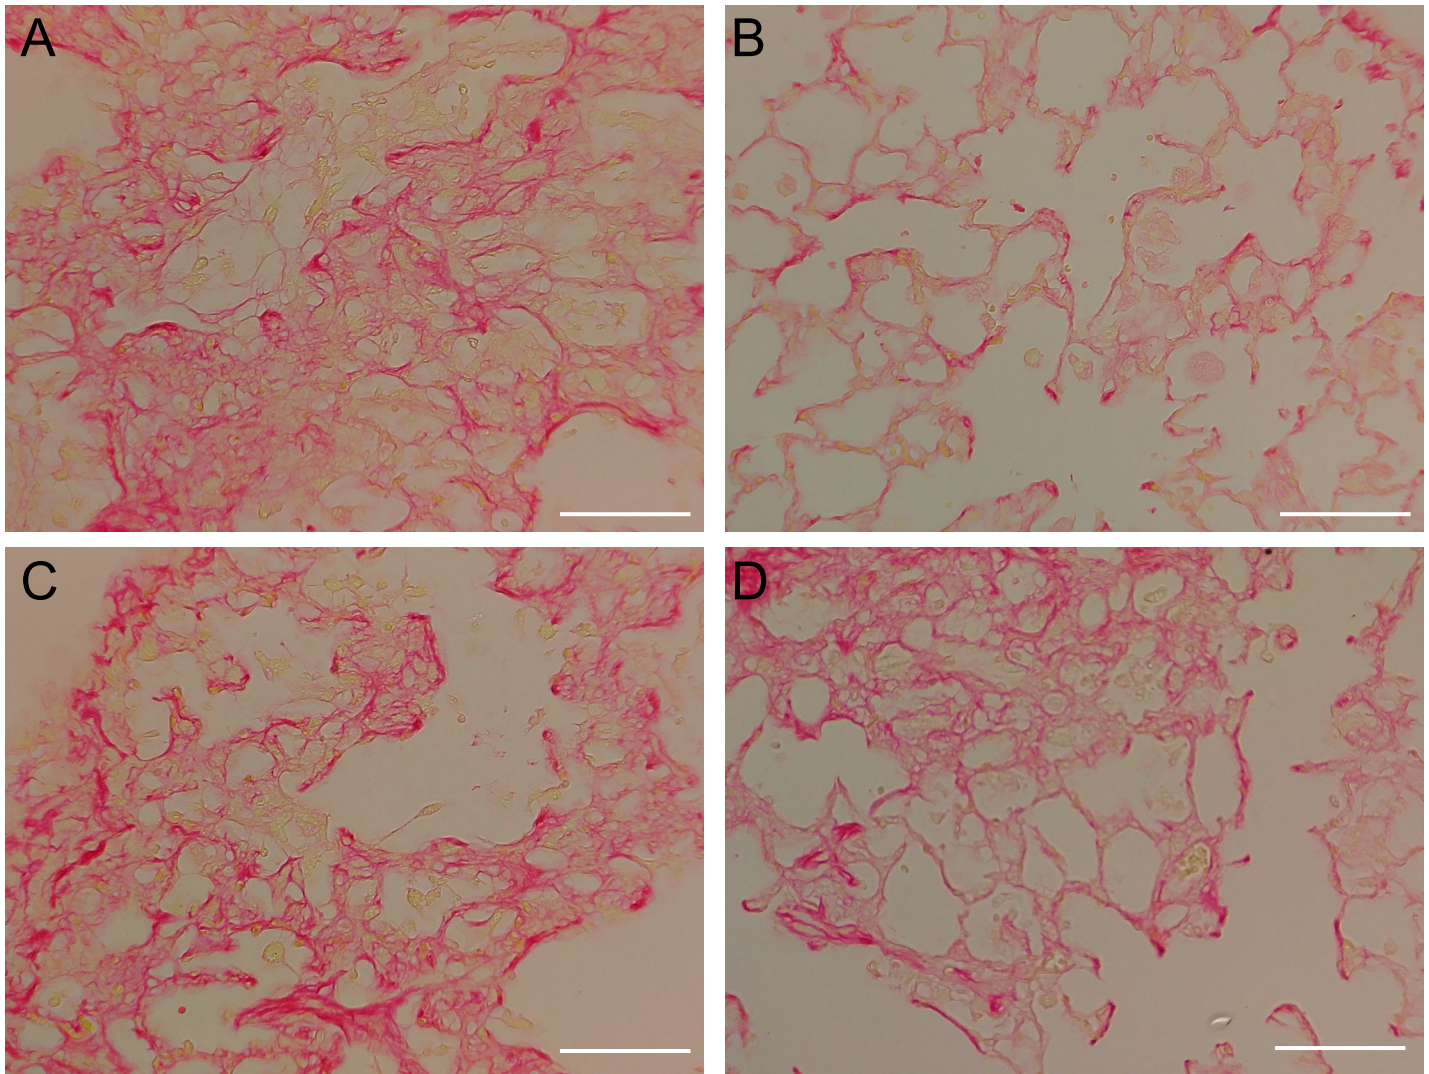

**Figure S8, Lung Picrosirius Red staining from the comparator Study MDI-2517, Tiplaxtinin Low and High Dose.** Twelve-week-old male C57BL/6J mice were subcutaneously implanted with osmotic pumps that delivers 100U/kg (total) of bleomycin over 7 days. The pumps were then removed, and at that time the mice were placed on treatment chows (drug concentration in chow: Vehicle, 0 mg/kg, MDI-2517 at 500 mg/kg, Tiplaxtinin Low dose at 500 mg/kg or Tiplaxtinin High dose at 5000 mg/kg). On day 28 mice were sacrificed and lung tissues prepared for histological analysis. A) Bleomycin control chow (No Treatment), B) Bleomycin MDI-2517 chow, C) Bleomycin Tiplaxtinin Low dose chow, D) Bleomycin Tiplaxtinin High dose chow. Scale bar = 50 $\mu$ m.

**Supplementary Table S1: Gene components of our ECM module score**

| Symbol   | Symbol  | Symbol   | Symbol | Symbol  | Symbol   | Symbol  |
|----------|---------|----------|--------|---------|----------|---------|
| A2M      | COL11A2 | COLGALT1 | IBSP   | LAMB1   | MMP8     | TIMP1   |
| ACAN     | COL12A1 | COLGALT2 | ICAM1  | LAMB2   | MMP9     | TIMP2   |
| ACTN1    | COL13A1 | COMP     | ICAM2  | LAMB3   | MUSK     | TLL1    |
| ADAM10   | COL14A1 | CRTAP    | ICAM3  | LAMC1   | NCAM1    | TLL2    |
| ADAM15   | COL15A1 | CTRB1    | ICAM4  | LAMC2   | NCAN     | TNC     |
| ADAM17   | COL16A1 | CTRB2    | ITGA1  | LAMC3   | NCSTN    | TNN     |
| ADAM8    | COL17A1 | CTSB     | ITGA10 | LOX     | NID1     | TNR     |
| ADAM9    | COL18A1 | CTSD     | ITGA11 | LOXL1   | NID2     | TNXB    |
| ADAMTS1  | COL19A1 | CTSG     | ITGA2  | LOXL2   | NRXN1    | TPSAB1  |
| ADAMTS14 | COL1A1  | CTSK     | ITGA2B | LOXL3   | NTN4     | TRAPPC4 |
| ADAMTS16 | COL1A2  | CTSL     | ITGA3  | LOXL4   | P3H1     | TTR     |
| ADAMTS18 | COL20A1 | CTSS     | ITGA4  | LRP4    | P3H2     | VCAM1   |
| ADAMTS2  | COL21A1 | CTSV     | ITGA5  | LTBP1   | P3H3     | VCAN    |
| ADAMTS3  | COL22A1 | DAG1     | ITGA6  | LTBP2   | P4HB     | VTN     |
| ADAMTS4  | COL23A1 | DCN      | ITGA7  | LTBP3   | PCOLCE   |         |
| ADAMTS5  | COL24A1 | DDR1     | ITGA8  | LTBP4   | PCOLCE2  |         |
| ADAMTS8  | COL25A1 | DDR2     | ITGA9  | LUM     | PDGFA    |         |
| ADAMTS9  | COL26A1 | DMD      | ITGAD  | MADCAM1 | PDGFB    |         |
| AGRN     | COL27A1 | DMP1     | ITGAE  | MATN1   | PECAM1   |         |
| ASPN     | COL28A1 | DSPP     | ITGAL  | MATN3   | PLEC     |         |
| BCAN     | COL2A1  | DST      | ITGAM  | MATN4   | PLG      |         |
| BGN      | COL3A1  | EFEMP1   | ITGAV  | MFAP1   | PLOD1    |         |
| BMP1     | COL4A1  | EFEMP2   | ITGAX  | MFAP2   | PLOD2    |         |
| BMP10    | COL4A2  | ELANE    | ITGB1  | MFAP3   | PLOD3    |         |
| BMP2     | COL4A3  | ELN      | ITGB2  | MFAP4   | PPIB     |         |
| BMP4     | COL4A4  | F11R     | ITGB3  | MFAP5   | PRKCA    |         |
| BMP7     | COL4A5  | FBLN1    | ITGB4  | MMP1    | PRSS1    |         |
| BSG      | COL4A6  | FBLN2    | ITGB5  | MMP10   | PRSS2    |         |
| CAPN1    | COL5A1  | FBLN5    | ITGB6  | MMP11   | PSEN1    |         |
| CAPNS1   | COL5A2  | FBN1     | ITGB7  | MMP12   | PTPRS    |         |
| CASK     | COL5A3  | FBN2     | ITGB8  | MMP13   | SDC1     |         |
| CASP3    | COL6A1  | FBN3     | JAM2   | MMP14   | SDC2     |         |
| CD151    | COL6A2  | FGA      | JAM3   | MMP15   | SDC3     |         |
| CD44     | COL6A3  | FGB      | KDR    | MMP16   | SDC4     |         |
| CD47     | COL6A5  | FGF2     | KLK2   | MMP17   | SERPINE1 |         |
| CDH1     | COL6A6  | FGG      | KLK7   | MMP19   | SERPINH1 |         |
| CEACAM1  | COL7A1  | FMOD     | KLKB1  | MMP2    | SPARC    |         |
| CEACAM6  | COL8A1  | FN1      | LAMA1  | MMP20   | SPP1     |         |
| CEACAM8  | COL8A2  | FURIN    | LAMA2  | MMP24   | TGFB1    |         |
| CMA1     | COL9A1  | GDF5     | LAMA3  | MMP25   | TGFB2    |         |
| COL10A1  | COL9A2  | HAPLN1   | LAMA4  | MMP3    | TGFB3    |         |
| COL11A1  | COL9A3  | HSPG2    | LAMA5  | MMP7    | THBS1    |         |

**Supplemental Table S2. General characteristics of patients with SSc and healthy controls**

|                                    | <b>dc SSc</b> | <b>HC</b>     |
|------------------------------------|---------------|---------------|
| <b>Clinical variables</b>          | <b>N = 26</b> | <b>N = 16</b> |
| Age, mean (SD), years              | 54.0 (13.5)   | 52.7 (17.6)   |
| Male, n (%)                        | 6 (23.1)      | 4 (25)        |
| Race Black, n (%)                  | 4 (15.4)      | 1 (6.25)      |
| White, n (%)                       | 22 (84.6)     | 15 (93.75)    |
| Disease duration, mean (SD), years | 2.7 (2.6)     |               |
| mRSS, mean (SD)                    | 16.3 (10.6)   |               |
| ILD, n (%)                         | 13 (50.0)     |               |
| Anti centromere positive, n (%)    | 1 (3.8)       |               |
| Anti Scl-70 positive, n (%)        | 5 (19.2)      |               |
| Anti RNA polymerase, n (%)         | 6 (23.1)      |               |
| Immunosuppressants, n (%)          | 25 (96.2)     |               |

SSc, systemic sclerosis; dcSSc, diffuse cutaneous SSc; HC healthy controls; SD, standard deviation; mRSS, modified Rodnan skin score; ILD, interstitial lung disease.

| <b>Supplementary Table S3: Statistics</b> |                                   |         |
|-------------------------------------------|-----------------------------------|---------|
| Figure Number                             | Groups                            | P Value |
| Figure 1A                                 | Normal vs. SSc                    | <0.0001 |
|                                           | Correlation SerpinE1 vs mRSS      | 0.0003  |
| Figure 2A                                 | Normal vs. dcSSc                  | 0.0401  |
| Figure 2B                                 | SerpinE1                          | >0.9999 |
|                                           | ACTA2                             | 0.0156  |
|                                           | COL1A1                            | 0.0156  |
| Figure 2D                                 | Vehicle vs. MDI-2517 COL1A1       | 0.0064  |
|                                           | Vehicle vs. MDI-2517 SMA          | 0.0004  |
|                                           | Vehicle vs. MDI-2517 PAI-1        | 0.431   |
| Figure 3B                                 | Vehicle vs. MDI-2517              | 0.0147  |
| Figure 3D                                 | Vehicle vs. MDI-2517 Active PAI-1 | 0.0021  |
|                                           | Vehicle vs. MDI-2517 Total PAI-1  | 0.1229  |
| Figure 4A                                 | No treatment vs. Pirfenidone      | 0.4915  |
|                                           | No treatment vs. MMF              | 0.0573  |
|                                           | No treatment vs. MDI-2517         | <0.0001 |
|                                           | Pirfenidone vs. MMF               | 0.5496  |
|                                           | Pirfenidone vs. MDI-2517          | 0.0015  |
|                                           | MMF vs. MDI-2517                  | 0.0236  |
| Figure 4B                                 | Control Chow vs. Pirfenidone      | 0.9892  |
|                                           | Control Chow vs. MMF              | <0.0001 |
|                                           | Control Chow vs. MDI-2517         | <0.0001 |
|                                           | Pirfenidone vs. MMF               | <0.0001 |
|                                           | Pirfenidone vs. MDI-2517          | <0.0001 |
|                                           | MMF vs. MDI-2517                  | 0.0583  |
| Figure 4C                                 | Vehicle vs. MDI-2517              | 0.0411  |
|                                           | Vehicle vs. Pirfenidone           | 0.4186  |
|                                           | Vehicle vs. MMF                   | 0.042   |
|                                           | MDI-2517 vs. Pirfenidone          | 0.0074  |
|                                           | MDI-2517 vs. MMF                  | 0.9907  |
|                                           | Pirfenidone vs. MMF               | 0.0076  |
| Figure 4D                                 | Vehicle vs. MDI-2517              | 0.0003  |
|                                           | Vehicle vs. Pirfenidone           | 0.4599  |
|                                           | Vehicle vs. MMF                   | 0.0032  |
|                                           | MDI-2517 vs. Pirfenidone          | 0.0015  |
|                                           | MDI-2517 vs. MMF                  | 0.2232  |
|                                           | Pirfenidone vs. MMF               | 0.0158  |

|           |                                         |         |
|-----------|-----------------------------------------|---------|
| Figure 4E | Vehicle vs. MDI-2517                    | 0.0056  |
|           | Vehicle vs. Pirfenidone                 | 0.349   |
|           | Vehicle vs. MMF                         | 0.3107  |
|           | MDI-2517 vs. Pirfenidone                | 0.0395  |
|           | MDI-2517 vs. MMF                        | 0.0007  |
|           | Pirfenidone vs. MMF                     | 0.0637  |
| Figure 5A | Saline Vehicle vs. Saline MDI-2517      | >0.9999 |
|           | Saline Vehicle vs. Bleo Vehicle         | <0.0001 |
|           | Saline Vehicle vs. Bleo MDI-2517        | 0.0055  |
|           | Saline Vehicle vs. Bleo MMF             | <0.0001 |
|           | Saline Vehicle vs. Bleo MMF+MDI-2517    | 0.0130  |
|           | Saline MDI-2517 vs. Bleo Vehicle        | <0.0001 |
|           | Saline MDI-2517 vs. Bleo MDI-2517       | 0.0066  |
|           | Saline MDI-2517 vs. Bleo MMF            | <0.0001 |
|           | Saline MDI-2517 vs. Bleo MMF+MDI-2517   | 0.0151  |
|           | Bleo Vehicle vs. Bleo MDI-2517          | <0.0001 |
|           | Bleo Vehicle vs. Bleo MMF               | 0.4135  |
|           | Bleo Vehicle vs. Bleo MMF+MDI-2517      | <0.0001 |
|           | Bleo MDI-2517 vs. Bleo MMF              | 0.0097  |
|           | Bleo MDI-2517 vs. Bleo MMF+MDI-2517     | >0.9999 |
|           | Bleo MMF vs. Bleo MMF+MDI-2517          | 0.0275  |
| Figure 5B | Control Chow vs. MDI-2517               | 0.0391  |
|           | Control Chow vs. MMF                    | 0.9305  |
|           | Control Chow vs. MMF+MDI-2517           | 0.9868  |
|           | MDI-2517 vs. MMF                        | <0.0001 |
|           | MDI-2517 vs. MMF+MDI-2517               | 0.0033  |
|           | MMF vs. MMF+MDI-2517                    | 0.4099  |
|           | Saline+Control Chow vs. Saline+MDI-2517 | 0.9928  |
| Figure 6G | Vehicle vs. MDI-2517                    | 0.0005  |
|           | Vehicle vs. MMF                         | 0.9952  |
|           | Vehicle vs. MMF+MDI-2517                | 0.0017  |
|           | Vehicle vs. Vehicle                     | <0.0001 |
|           | Vehicle vs. MDI-2517                    | <0.0001 |
|           | MDI-2517 vs. MMF                        | 0.0018  |
|           | MDI-2517 vs. MMF+MDI-2517               | 0.9952  |
|           | MDI-2517 vs. Vehicle                    | 0.0097  |
|           | MDI-2517 vs. MDI-2517                   | 0.0138  |
|           | MMF vs. MMF+MDI-2517                    | 0.0038  |

|           |                                       |         |
|-----------|---------------------------------------|---------|
|           | MMF vs. Vehicle                       | <0.0001 |
|           | MMF vs. MDI-2517                      | <0.0001 |
|           | MMF+MDI-2517 vs. Vehicle              | 0.0119  |
|           | MMF+MDI-2517 vs. MDI-2517             | 0.0151  |
|           | Vehicle vs. MDI-2517                  | 0.9936  |
| Figure 7G | Saline Vehicle vs. Saline MDI-2517    | 0.6761  |
|           | Saline Vehicle vs. Bleo Vehicle       | <0.0001 |
|           | Saline Vehicle vs. Bleo MDI-2517      | <0.0001 |
|           | Saline Vehicle vs. Bleo MMF           | <0.0001 |
|           | Saline Vehicle vs. Bleo MMF+MDI-2517  | <0.0001 |
|           | Saline MDI-2517 vs. Bleo Vehicle      | <0.0001 |
|           | Saline MDI-2517 vs. Bleo MDI-2517     | <0.0001 |
|           | Saline MDI-2517 vs. Bleo MMF          | <0.0001 |
|           | Saline MDI-2517 vs. Bleo MMF+MDI-2517 | <0.0001 |
|           | Bleo Vehicle vs. Bleo MDI-2517        | <0.0001 |
|           | Bleo Vehicle vs. Bleo MMF             | 0.0131  |
|           | Bleo Vehicle vs. Bleo MMF+MDI-2517    | <0.0001 |
|           | Bleo MDI-2517 vs. Bleo MMF            | 0.0259  |
|           | BleoMDI-2517 vs. Bleo MMF+MDI-2517    | 0.6106  |
|           | Bleo MMF vs. Bleo MMF+MDI-2517        | 0.0911  |
| Figure 7H | Saline Vehicle vs. Saline MDI-2517    | >0.9999 |
|           | Saline Vehicle vs. Bleo Vehicle       | <0.0001 |
|           | Saline Vehicle vs. Bleo MDI-2517      | 0.2906  |
|           | Saline Vehicle vs. Bleo MMF           | 0.0224  |
|           | Saline Vehicle vs. Bleo MMF+MDI-2517  | 0.5965  |
|           | Saline MDI-2517 vs. Bleo Vehicle      | <0.0001 |
|           | Saline MDI-2517 vs. Bleo MDI-2517     | 0.3008  |
|           | Saline MDI-2517 vs. Bleo MMF          | 0.0235  |
|           | Saline MDI-2517 vs. Bleo MMF+MDI-2517 | 0.6092  |
|           | Bleo Vehicle vs. Bleo MDI-2517        | <0.0001 |
|           | Bleo Vehicle vs. Bleo MMF             | 0.0235  |
|           | Bleo Vehicle vs. Bleo MMF+MDI-2517    | <0.0001 |
|           | Bleo MDI-2517 vs. Bleo MMF            | 0.6076  |
|           | Bleo MDI-2517 vs. Bleo MMF+MDI-2517   | 0.9972  |
|           | Bleo MMF vs. Bleo MMF+MDI-2517        | 0.4149  |
| Figure 8A | Vehicle vs. MDI-2517                  | <0.0001 |
|           | Vehicle vs. Tiplaxtinin High          | 0.0995  |
|           | Vehicle vs. Tiplaxtinin Low           | 0.9308  |

|            |                                                |         |
|------------|------------------------------------------------|---------|
|            | MDI-2517 vs. Tiplaxtinin High                  | <0.0001 |
|            | MDI-2517 vs. Tiplaxtinin Low                   | <0.0001 |
|            | Tiplaxtinin High vs. Tiplaxtinin Low           | 0.3008  |
| Figure 8B  | Vehicle vs. MDI-2517                           | <0.01   |
|            | Vehicle vs. Tiplaxtinin Low Dose               | <0.01   |
|            | Vehicle vs. Tiplaxtinin High Dose              | <0.01   |
|            | MDI-2517 vs. Tiplaxtinin Low Dose              | <0.01   |
|            | MDI-2517 vs. Tiplaxtinin High Dose             | <0.01   |
|            | Tiplaxtinin Low Dose vs. Tiplaxtinin High Dose | <0.01   |
| Figure 9E  | Vehicle vs. MDI-2517                           | 0.001   |
|            | Vehicle vs. Tiplaxtinin High Dose              | 0.9427  |
|            | Vehicle vs. Tiplaxtinin Low Dose               | 0.9212  |
|            | MDI-2517 vs. Tiplaxtinin High Dose             | 0.0002  |
|            | MDI-2517 vs. Tiplaxtinin Low Dose              | 0.0002  |
|            | Tiplaxtinin High Dose vs. Tiplaxtinin Low Dose | 0.9999  |
| Figure 10E | Vehicle vs. MDI-2517                           | <0.0001 |
|            | Vehicle vs. Tiplaxtinin High Dose              | 0.0006  |
|            | Vehicle vs. Tiplaxtinin Low Dose               | 0.6916  |
|            | MDI-2517 vs. Tiplaxtinin High Dose             | 0.0001  |
|            | MDI-2517 vs. Tiplaxtinin Low Dose              | <0.0001 |
|            | Tiplaxtinin High Dose vs. Tiplaxtinin Low Dose | 0.0047  |
| Figure 10F | Vehicle vs. MDI-2517                           | <0.0001 |
|            | Vehicle vs. Tiplaxtinin High Dose              | 0.1601  |
|            | Vehicle vs. Tiplaxtinin Low Dose               | 0.7807  |
|            | MDI-2517 vs. Tiplaxtinin High Dose             | 0.0001  |
|            | MDI-2517 vs. Tiplaxtinin Low Dose              | <0.0001 |
|            | Tiplaxtinin High Dose vs. Tiplaxtinin Low Dose | 0.7495  |
